# Supplementary material
Source: MDPI journal article supplement (https://www.mdpi.com/2813-0227/4/2/12)
Supplement: s1 [file s1]

**Supplement to: A Zoonotic Strain of *Rocahepevirus Ratti* Hepatitis E Virus Does Not Replicate Efficiently within Human Placental JEG-3 Cells**

**1. Transfection of Huh7 S10-3 cells with the *Rocahepevirus ratti* HEV LCK-3110 strain.**

RNA transfection was done using the Mirus Trans-IT mRNA transfection kit. Cells were passed 1:3 to three new wells after 48 hours post transfection. Cells were incubated for an additional 3 days. Productive replication in the huh7 S10-3 cells was assessed via immunohistochemistry. Rabbit anti-ORF2 polyclonal serum was used against the ORF2 capsid protein [1]. We detected cells expressing the ORF2 protein transcribed from subgenomic viral RNA demonstrating successful replication.

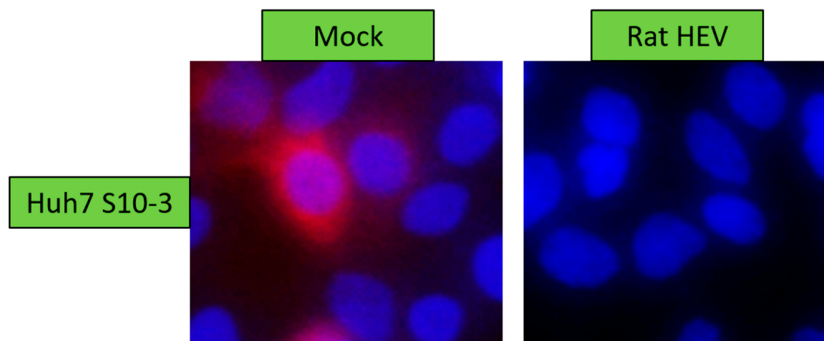

**Figure S1.** LCK-3110 rat HEV is replication competent in cells. Immunofluorescence detection of rat HEV ORF2 antigen in methanol fixed huh7 S10-3 cells after 5 days post transfection. Cells are stained with goat anti-rabbit IgG H&L combined with anti-rabbit Alexa Fluor 594 (red), and 4', 6-diamidino-2-phenylindole (DAPI) (blue).

**2. Human hepatoma cell lines Huh7 and HepG2/C3A allow LCK-3110 replication.**

Huh7 S10-3 and HepG2/C3A cells were infected utilizing the 10% fecal suspension derived from intravenously inoculated conventional pigs (rat HEV LCK-3110 was amplified in gnotobiotic pigs via intrahepatic inoculation of the capped RNA transcripts of LCK-3110 strain; 10% fecal suspension derived from the gnotobiotic pigs was used as an inoculum in the conventional pigs) [2]. In brief, the infections were performed utilizing a 10% fecal suspension diluted 1:5 in DMEM and filtered using 0.45  $\mu$ m. Cells

were inoculated with 1 ml of the resulting solution which contained  $1 \times 10^7$  viral RNA copies by replacing the media. Plates were rocked at room temperature for 1 hour and then incubated at 37°C. After 6 hours, the inoculum was removed, and fresh media was added. Cells were passaged 1:3 after 42 hours. On day 6 post inoculation, an immunofluorescence assay was done to see the infectious ability of rat HEV derived from conventional pig feces.

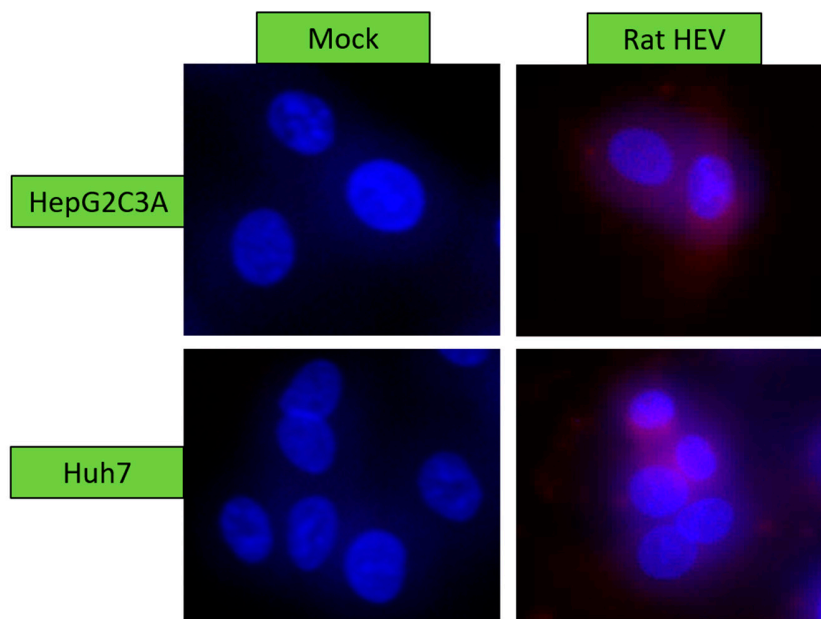

**Figure S2.** Isolation of rat HEV from infected pig feces in cell culture.

Immunofluorescence detection of rat HEV ORF2 antigen in methanol fixed Huh7 and HepG2/C3A cells after 6 days post inoculation. Cells are stained with goat anti-rabbit IgG H&L combined with anti-rabbit Alexa Fluor 594 (red), and 4', 6-diamidino-2-phenylindole (DAPI) (blue).

#### References:

1. Yadav, K.K.; Boley, P.A.; Fritts, Z.; Kenney, S.P. Ectopic Expression of Genotype 1 Hepatitis E Virus ORF4 Increases Genotype 3 HEV Viral Replication in Cell Culture. *Viruses* 2021, 13, doi:10.3390/v13010075.
2. Yadav, K.K.; Boley, P.A.; Lee, C.M.; Khatiwada, S.; Jung, K.; Laocharoensuk, T.; Hofstetter, J.; Wood, R.; Hanson, J.; Kenney, S.P. Rat hepatitis E virus (HEV) cross-species infection and transmission in pigs. *bioRxiv* 2023, 10.1101/2023.07.06.547957, 2023.2007.2006.547957, doi:10.1101/2023.07.06.547957.
